# Supplementary material for: Decreasing Inappropriate Use of Antibiotics in Primary Care in Four Countries in South America—Cluster Randomized Controlled Trial
Source: PubMed Central journal article supplement (PMC5745481; doi:10.3390/antibiotics6040038), 2017-12-14
Supplement: antibiotics-06-00038-s001.pdf [file antibiotics-06-00038-s001.pdf]

## Supplementary Materials

### Supplementary Tables

**Table S1.** Distribution of diagnosis before and after the intervention

| Diagnoses          | 2014 (n = 8483)     | 2015 (n = 8052)     |
|--------------------|---------------------|---------------------|
|                    | Missing = 72 (0.8%) | Missing = 5 (0.06%) |
| Common cold        | 3358 (39.5%)        | 3394 (42.1%)        |
| Acute Otitis Media | 293 (3.4%)          | 221 (2.7%)          |
| Acute sinusitis    | 199 (2.3%)          | 174 (2.1%)          |
| Acute pharyngitis  | 1471 (17.3%)        | 1421 (17.6%)        |
| Acute tonsillitis  | 944 (11.1%)         | 889 (11%)           |
| Influenza          | 812 (9.5%)          | 705 (8.7%)          |
| Acute bronchitis   | 269 (3.1%)          | 307 (3.8%)          |
| Pneumonia          | 141 (1.6%)          | 156 (1.9%)          |
| COPD               | 213 (2.5%)          | 241 (2.9%)          |
| Other RTI          | 711 (8.3%)          | 539 (6.6%)          |

**Table S2.** Reduction in prescription of antibiotics in patients with suspected RTI within and across randomization groups—Adjusted by prescribing style

| Outcomes         | OR   | 95%CI      | <i>p</i> Value <sup>‡</sup> |
|------------------|------|------------|-----------------------------|
| Acute bronchitis |      |            |                             |
| Intervention     | 0.24 | 0.15;0.40  | 0.001                       |
| Control          | 0.62 | 0.41;0.95  |                             |
| Acute Otitis     |      |            |                             |
| Intervention     | 0.37 | 0.12;1.11  | 0.05                        |
| Control          | 1.3  | 0.4;2      |                             |
| All RTI          |      |            |                             |
| Intervention     | 0.60 | 0.54; 0.66 | <0.001                      |
| Control          | 0.83 | 0.75;0.92  |                             |

<sup>‡</sup>*p* value of the interaction term intervention\*year. Prescribing style = binary variable divided into high and low prescribers. High prescribers are those GPs prescribing antibiotics to more than 75% of their patients.
